# Supplementary material for: Single nucleotide polymorphisms (SNPs) are highly conserved in rhesus (Macaca mulatta) and cynomolgus (Macaca fascicularis) macaques
Source: PubMed Central journal article supplement (PMC2248198; doi:10.1186/1471-2164-8-480), 2007-12-31
Supplement: 1471-2164-8-480-S1.pdf [file 1471-2164-8-480-S1.pdf]

| Official<br>Symbol | Gene Name                         | Reference<br>Sequence |            | Private to M.<br>fascicularis | Present in<br>M. mulatta |
|--------------------|-----------------------------------|-----------------------|------------|-------------------------------|--------------------------|
|                    |                                   | Accession             | SNP        |                               |                          |
| CCL5               | chemokine (C-C motif) ligand 5    | BV723923              | CCL5:106   |                               | x                        |
| CCL5               | chemokine (C-C motif) ligand 5    | BV723923              | CCL5:266   | x                             |                          |
| CCL5               | chemokine (C-C motif) ligand 5    | BV723923              | CCL5:31    | x                             |                          |
| CCL5               | chemokine (C-C motif) ligand 5    | BV723923              | CCL5:486   | x                             |                          |
| CCL5               | chemokine (C-C motif) ligand 5    | BV723923              | CCL5:510   | x                             |                          |
| CCL5               | chemokine (C-C motif) ligand 5    | BV723923              | CCL5:72    | x                             |                          |
| CCL5               | chemokine (C-C motif) ligand 5    | BV723923              | CCL5:73    |                               | x                        |
| CCL8               | chemokine (C-C motif) ligand 8    | BV723924              | CCL8:219   |                               | x                        |
| CCL8               | chemokine (C-C motif) ligand 8    | BV723924              | CCL8:248   |                               | x                        |
| CCL8               | chemokine (C-C motif) ligand 8    | BV723924              | CCL8:269   | x                             |                          |
| CCL8               | chemokine (C-C motif) ligand 8    | BV723924              | CCL8:313   | x                             |                          |
| CCL8               | chemokine (C-C motif) ligand 8    | BV723924              | CCL8:384   |                               | x                        |
| CCL8               | chemokine (C-C motif) ligand 8    | BV723924              | CCL8:452   |                               | x                        |
| CCL8               | chemokine (C-C motif) ligand 8    | BV723924              | CCL8:461   | x                             |                          |
| CCL8               | chemokine (C-C motif) ligand 8    | BV723924              | CCL8:516   |                               | x                        |
| CCL8               | chemokine (C-C motif) ligand 8    | BV723924              | CCL8:578   | x                             |                          |
| CCL8               | chemokine (C-C motif) ligand 8    | BV723924              | CCL8:586   |                               | x                        |
| CCL8               | chemokine (C-C motif) ligand 8    | BV723924              | CCL8:611   | x                             |                          |
| CCL8               | chemokine (C-C motif) ligand 8    | BV723924              | CCL8:618   |                               | x                        |
| CCL8               | chemokine (C-C motif) ligand 8    | BV723924              | CCL8:87    | x                             |                          |
| CCR1               | chemokine (C-C motif) receptor 1  | BV723925              | CCR1:349   | x                             |                          |
| CCR1               | chemokine (C-C motif) receptor 1  | BV723925              | CCR1:463   |                               | x                        |
| CCR1               | chemokine (C-C motif) receptor 1  | BV723925              | CCR1:641   |                               | x                        |
| CCR9               | chemokine (C-C motif) receptor 9  | BV723921              | CCR9:315   |                               | x                        |
| CCR9               | chemokine (C-C motif) receptor 9  | BV723921              | CCR9:525   | x                             |                          |
| CD44               | CD44 antigen                      | BV723926              | CD44:234   | x                             |                          |
| CD44               | CD44 antigen                      | BV723926              | CD44:240   |                               | x                        |
| CD44               | CD44 antigen                      | BV723926              | CD44:245   |                               | x                        |
| CD44               | CD44 antigen                      | BV723926              | CD44:302   |                               | x                        |
| CD44               | CD44 antigen                      | BV723926              | CD44:471   |                               | x                        |
| CD44               | CD44 antigen                      | BV723926              | CD44:478   | x                             |                          |
| CD74               | CD74 antigen                      | BV723922              | CD74:115   | x                             |                          |
| CD74               | CD74 antigen                      | BV723922              | CD74:124   |                               | x                        |
| CD74               | CD74 antigen                      | BV723922              | CD74:138   |                               | x                        |
| CD74               | CD74 antigen                      | BV723922              | CD74:186   |                               | x                        |
| CD74               | CD74 antigen                      | BV723922              | CD74:213   |                               | x                        |
| CD74               | CD74 antigen                      | BV723922              | CD74:247   |                               | x                        |
| CD74               | CD74 antigen                      | BV723922              | CD74:270   |                               | x                        |
| CD74               | CD74 antigen                      | BV723922              | CD74:339   | x                             |                          |
| CD74               | CD74 antigen                      | BV723922              | CD74:438   |                               | x                        |
| CXCL12             | chemokine (C-X-C motif) ligand 12 | BV723927              | CXCL12:108 | x                             |                          |
| CXCL12             | chemokine (C-X-C motif) ligand 12 | BV723927              | CXCL12:183 | x                             |                          |
| CXCL12             | chemokine (C-X-C motif) ligand 12 | BV723927              | CXCL12:234 | x                             |                          |
| CXCL12             | chemokine (C-X-C motif) ligand 12 | BV723927              | CXCL12:239 | x                             |                          |
| CXCL12             | chemokine (C-X-C motif) ligand 12 | BV723927              | CXCL12:338 | x                             |                          |
| CXCL12             | chemokine (C-X-C motif) ligand 12 | BV723927              | CXCL12:492 | x                             |                          |
| CXCL12             | chemokine (C-X-C motif) ligand 12 | BV723927              | CXCL12:546 |                               | x                        |
| CXCL12             | chemokine (C-X-C motif) ligand 12 | BV723927              | CXCL12:58  | x                             |                          |
| CXCL12             | chemokine (C-X-C motif) ligand 12 | BV723927              | CXCL12:70  | x                             |                          |
| CXCL12             | chemokine (C-X-C motif) ligand 12 | BV723927              | CXCL12:95  |                               | x                        |
| IFNG               | interferon, gamma                 | BV723928              | IFNG:193   |                               | x                        |
| IFNG               | interferon, gamma                 | BV723928              | IFNG:312   |                               | x                        |

| Official<br>Symbol | Gene Name                      | Reference<br>Sequence |          | Private to M.<br>fascicularis | Present in<br>M. mulatta |
|--------------------|--------------------------------|-----------------------|----------|-------------------------------|--------------------------|
|                    |                                | Accession             | SNP      |                               |                          |
| <i>IFNG</i>        | <i>interferon, gamma</i>       | BV723928              | IFNG:391 |                               | x                        |
| <i>IFNG</i>        | <i>interferon, gamma</i>       | BV723928              | IFNG:437 |                               | x                        |
| <i>IFNG</i>        | <i>interferon, gamma</i>       | BV723928              | IFNG:469 |                               | x                        |
| <i>NOS1</i>        | <i>nitric oxide synthase 1</i> | BV723929              | NOS1:213 | x                             |                          |
| <i>NOS1</i>        | <i>nitric oxide synthase 1</i> | BV723929              | NOS1:245 |                               | x                        |
| <i>NOS1</i>        | <i>nitric oxide synthase 1</i> | BV723929              | NOS1:295 |                               | x                        |
| <i>NOS1</i>        | <i>nitric oxide synthase 1</i> | BV723929              | NOS1:329 |                               | x                        |
| <i>NOS1</i>        | <i>nitric oxide synthase 1</i> | BV723929              | NOS1:405 |                               | x                        |
| <i>NOS1</i>        | <i>nitric oxide synthase 1</i> | BV723929              | NOS1:434 | x                             |                          |
| <i>NOS1</i>        | <i>nitric oxide synthase 1</i> | BV723929              | NOS1:437 | x                             |                          |
| <i>TLR4</i>        | <i>toll-like receptor 4</i>    | BV723930              | TLR4:231 |                               | x                        |
| <i>TLR4</i>        | <i>toll-like receptor 4</i>    | BV723930              | TLR4:320 | x                             |                          |
| <i>TLR4</i>        | <i>toll-like receptor 4</i>    | BV723930              | TLR4:346 | x                             |                          |
| <i>TLR4</i>        | <i>toll-like receptor 4</i>    | BV723930              | TLR4:359 |                               | x                        |
| <i>TLR4</i>        | <i>toll-like receptor 4</i>    | BV723930              | TLR4:513 | x                             |                          |
| <i>TLR4</i>        | <i>toll-like receptor 4</i>    | BV723930              | TLR4:520 | x                             |                          |
| <i>TLR4</i>        | <i>toll-like receptor 4</i>    | BV723930              | TLR4:641 | x                             |                          |
