# Supplementary material for: Single nucleotide polymorphisms (SNPs) are highly conserved in rhesus (Macaca mulatta) and cynomolgus (Macaca fascicularis) macaques
Source: PubMed Central journal article supplement (PMC2248198; doi:10.1186/1471-2164-8-480), 2007-12-31
Supplement: 1471-2164-8-480-S3.pdf [file 1471-2164-8-480-S3.pdf]

| <b>Genes analyzed with SNP Assay</b> | <b>Analyzed through direct sequencing</b> | <b>Chromosome</b> |
|--------------------------------------|-------------------------------------------|-------------------|
| <i>ADRBK2</i>                        |                                           | 10                |
| <i>AGRP</i>                          |                                           | 20                |
| <i>BCHE</i>                          |                                           | 2                 |
| <i>CCL5</i>                          | X                                         | 16                |
| <i>CCL8</i>                          | X                                         | 16                |
| <i>CCR1</i>                          | X                                         | 2                 |
| <i>CCR4</i>                          |                                           | 2                 |
| <i>CCR7</i>                          |                                           | 16                |
| <i>CCR9</i>                          | X                                         | 2                 |
| <i>CCRL1</i>                         |                                           | 2                 |
| <i>CD4</i>                           |                                           | 11                |
| <i>CD40</i>                          |                                           | 10                |
| <i>CD40LG</i>                        |                                           | X                 |
| <i>CD44</i>                          | X                                         | 14                |
| <i>CD69</i>                          |                                           | 11                |
| <i>CD74</i>                          | X                                         | 6                 |
| <i>CFTR</i>                          |                                           | 3                 |
| <i>CX3CR1</i>                        |                                           | 2                 |
| <i>CXCL12</i>                        | X                                         | 9                 |
| <i>CYP11A1</i>                       |                                           | 7                 |
| <i>DAF</i>                           |                                           | 1                 |
| <i>FAS</i>                           |                                           | 9                 |
| <i>FSHR</i>                          |                                           | 13                |
| <i>HTATSF1</i>                       |                                           | X                 |
| <i>IFNB1</i>                         |                                           | 15                |
| <i>IFNG</i>                          | X                                         | 11                |
| <i>IL1</i>                           |                                           | 12                |
| <i>IL16</i>                          |                                           | 7                 |
| <i>IL2</i>                           |                                           | 5                 |
| <i>IL2RA</i>                         |                                           | 9                 |
| <i>IL6ST</i>                         |                                           | 6                 |
| <i>INHBB</i>                         |                                           | 12                |
| <i>ITGA4</i>                         |                                           | 12                |
| <i>ITGAX</i>                         |                                           | 20                |
| <i>ITGB2</i>                         |                                           | 3                 |
| <i>LRP8</i>                          |                                           | 1                 |

| <b>Genes analyzed with SNP Assay</b> | <b>Analyzed through direct sequencing</b> | <b>Chromosome</b> |
|--------------------------------------|-------------------------------------------|-------------------|
| <i>MAOA</i>                          |                                           | X                 |
| <i>MPDZ</i>                          |                                           | 15                |
| <i>NDN</i>                           |                                           | 7                 |
| <i>NOS1</i>                          | X                                         | 11                |
| <i>NPY</i>                           |                                           | 3                 |
| <i>NR3C1</i>                         |                                           | 6                 |
| <i>PYY</i>                           |                                           | 16                |
| <i>SASH1</i>                         |                                           | 4                 |
| <i>SIRT1</i>                         |                                           | 9                 |
| <i>SLC5A7</i>                        |                                           | 12                |
| <i>SLC6A4</i>                        |                                           | 16                |
| <i>SNCA</i>                          |                                           | 5                 |
| <i>STAR</i>                          |                                           | 8                 |
| <i>TLR4</i>                          | X                                         | 15                |
| <i>TLR5</i>                          |                                           | 1                 |
| <i>TNF</i>                           |                                           | 4                 |
| <i>XCL1</i>                          |                                           | 1                 |
