# Supplementary material for: Single nucleotide polymorphisms (SNPs) are highly conserved in rhesus (Macaca mulatta) and cynomolgus (Macaca fascicularis) macaques
Source: PubMed Central journal article supplement (PMC2248198; doi:10.1186/1471-2164-8-480), 2007-12-31
Supplement: 1471-2164-8-480-S4.pdf [file 1471-2164-8-480-S4.pdf]

| <b>Official Symbol</b> | <b>Analyzed Region (bp)</b> | <b>Forward Primer (5' to 3')</b> | <b>Backward Primer (5' to 3')</b> | <b>Reference Sequence Accession</b> |
|------------------------|-----------------------------|----------------------------------|-----------------------------------|-------------------------------------|
| CCL5                   | 558                         | GAGGCTTCCCCTCACTATCC             | CCAGGAGGAAATCAAACCAA              | BV723923                            |
| CCL8                   | 580                         | GGAGAGATGGGTCAGGGATT             | CATGGCCAAAAGACATTCT               | BV723924                            |
| CCR1                   | 691                         | AATCCAAAGCTGTCCGTCTG             | GTGGGAAATGGGTGACTTTG              | BV723925                            |
| CCR9                   | 609                         | GGAGGGAGAAAAGGCTTCTG             | CATCAGTGGGGAAACTGCTT              | BV723921                            |
| CD44                   | 459                         | GGGAGCTGGGACACTTAACA             | TCAAAGGACCTCCAGGGTTT              | BV723926                            |
| CD74                   | 462                         | GTCACCCTTGAAACGAAAA              | GGGCTGCATTCTCTCACCTA              | BV723922                            |
| CXCL12                 | 606                         | CAGAGGGGCTGAATAGCAGA             | CCATGTCCAGAAAATTCCAA              | BV723927                            |
| IFNG                   | 450                         | TCCTGTGACTGTTTCACTTAATCC         | CATTTAATGGAACCAAATGCAA            | BV723928                            |
| NOS1                   | 460                         | CTCAGGGTGGGAAGAACTTG             | TGTTGGTGCCCTCATTGTAA              | BV723929                            |
| TLR4                   | 570                         | CAAGATGCCCTTCAATTTT              | CTGGCAGTGAAGAGGGTACA              | BV723930                            |
